# Supplementary material for: Localization of the Autism Spectrum Disorder Knowledge Scale Professional Version (ASKSP-R) in Western Cities of China: A Case Study
Source: Research Square preprint supplement (doi:10.21203/rs.3.rs-6184251/v1), 2025-04-14
Supplement: Supplementary file 1 [file ed36674b1b2666f862424896.docx]

The Chinese version of Autism Spectrum Knowledge Scale, Professional Version - Revised (ASKSP-R)

The Chinese version of ASKSP-R, is a 25-item scale designed to assess knowledge of autism spectrum (ASD) disorder in professionals that regularly work with, are likely to work with, or plan to regularly work with individuals with ASD. The Chinese version of ASKSP-R is appropriate for professionals in training and practitioners in China.

Instructions: Please answer the following questions. If you do not know an answer, please select

“Don’t Know” (do not guess). Please refrain from looking up any questions you do not know.

1. Current estimates suggest that autism spectrum disorder affects approximately ______ percent of the population in China?

a. 1%

b. 2%

c. 0.1%

d. 0.2%

e. Don't Know

2. Autism spectrum disorder is approximately ______ times more likely to be diagnosed in boys than girls in China.

a. 0 times (diagnosed equally in boys and girls)

b. 2 times

c. 4 times

d. 5 times

e. Don't Know

3. Which of the following is not a risk factor associated with autism spectrum disorder?

a. Advanced paternal age

b. Family history of autism spectrum disorder

c. Vaccines

d. Pollution

e. Don't Know

4. Identification rates of autism spectrum disorder across ethnic groups in China are:

a. Equal across all ethnic groups

b. Unequal, with Han Chinese children diagnosed more frequently and earlier than children from diverse ethnic backgrounds

c. Unequal, with children from diverse ethnic backgrounds diagnosed more frequently and earlier than Han Chinese children

d. Unknown regarding frequency across ethnic groups

e. Don't Know

5. Approximately ______ percent of individuals with autism spectrum disorder in China also have an intellectual disability.

a. 25%

b. 33%

c. 50%

d. 66%

e. Don't Know

6. To receive a diagnosis of autism spectrum disorder, an individual must exhibit deficits in ______ and demonstrate ______.

a. Attention; social communication deficits

b. Social communication; restricted and repetitive patterns of behavior, interests, or activities

c. Intellectual/cognitive functioning; social communication deficits

d. Social communication; sensory processing deficits

e. Don't Know

7. Which professional is qualified to diagnose autism spectrum disorder in China?

a. Licensed Psychologist

b. School-Based Psychologist

c. Teacher

d. Counselor

e. Don't Know

8. Which statement about intervention settings for children with autism spectrum disorder in China is incorrect?

a. Children under 1.5 years old may receive home-based intervention under professional medical guidance.

b. Children aged 1.5–3 years may undergo rehabilitation training in professional medical institutions alongside home-based intervention.

c. Children over 3 years old with mild symptoms and social communication abilities may receive inclusive education in general preschools combined with professional training.

d. Children over 3 years old with severe symptoms and limited social communication abilities may receive education in medical institutions, special education centers, or inclusive preschools.

e. Don't Know

9. Autism spectrum disorder_____

a. Can be diagnosed in adulthood

b. Can only be diagnosed in adulthood

c. Cannot be diagnosed in adulthood

d. Does not affect adults

e. Don't Know

10. Which is not an evidence-based intervention for autism spectrum disorder?

a. Video modeling

b. Applied behavior analysis

c. Pivotal response training

d. Equine therapy

e. Don't Know

11. Which is an evidence-based intervention for autism spectrum disorder?

a. Equine therapy

b. Food restrictions (e.g., gluten-free diets)

c. Pivotal response training

d. Exercise restrictions (e.g., limited running)

e. Don't Know

12. Up to ______ percent of individuals with autism spectrum disorder also have a co-occurring mental health diagnosis.

a. 20%

b. 30%

c. 50%

d. 70%

e. Don't Know

13. When assessing a bilingual child for autism spectrum disorder in China, it is critical to gather language information about:

a. The child's native language development

b. The child's Mandarin development

c. Both the child's Mandarin and native language development

d. Mandarin development only between birth and age 2

e. Don't Know

14. According to the DSM-5, a diagnosis of autism spectrum disorder must include severity levels within ______ categories.

a. 2

b. 3

c. 4

d. 5

e. Don't Know

15. Autism spectrum disorder is classified as a ______.

a. Neurodevelopmental disorder

b. Trauma- and stressor-related disorder

c. Disruptive, impulse-control, and conduct disorder

d. Neurocognitive disorder

e. Don't Know

16. Which is not an example of a social communication/interaction deficit?

a. Poor eye contact

b. Poor reciprocal conversation

c. Poor articulation

d. Difficulty maintaining friendships

e. Don't Know

17. Which is not an example of restricted and repetitive behavior or interests?

a. Stereotypic motor movements

b. Strict adherence to routines

c. Echolalia

d. Obsessive behaviors

e. Don't Know

18. Autism spectrum disorder diagnoses are primarily based on:

a. Behavioral observations and parent/caregiver interviews

b. Neuroimaging

c. Genetic testing

d. Child interviews

e. Don't Know

19. Siblings of children with autism spectrum disorder are:

a. At lower risk for developing the disorder

b. At higher risk for developing the disorder

c. At neither higher nor lower risk

d. Risk levels remain unknown

e. Don't Know

20. Children with autism spectrum disorder are most likely to struggle with:

a. Reading speed

b. Reading comprehension

c. Phonological awareness

d. Reading accuracy

e. Don't Know

21. In China, diagnostic tools for autism spectrum disorder include:

a. Childhood Autism Rating Scale (CARS)

b. Integrated Visual and Auditory Continuous Performance Test (IVA-CPT)

c. Autism Behavior Checklist (ABC)

d. Peabody Picture Vocabulary Test (PPVT)

e. Don't Know

22. A reliable diagnosis of autism spectrum disorder can typically be made by age ______.

a. 2

b. 4

c. 6

d. 8

e. Don't Know

23. Most children with autism spectrum disorder in China are diagnosed after age:

a. 3 years

b. 4 years

c. 5 years

d. 6 years

e. Don't Know

24. Autism prevalence rates globally:

a. Are highly consistent with rates in China

b. Are extremely varied

c. Are much higher in African countries

d. Are higher in English-speaking countries

e. Don't Know

25. Clinicians are not required to specify ______ when diagnosing autism spectrum disorder.

a. Co-occurring intellectual impairment

b. Association with medical/genetic conditions or environmental factors

c. Association with sensory sensitivities

d. Co-occurring language impairment

e. Don't Know

Chinese version of ASKSP-R Answer Key and Scoring Template

Instructions: For each item score a 1 for each question answered correctly. Score 0 for each item

answered incorrectly. Score “don’t know” responses as incorrect. Add up the number of items

answered correctly to obtain the total score. Take the total score divided by 25 to obtain the

percent correct.

| **Question** | **Correct Response** | **Rater Response** | **Score** | |
| --- | --- | --- | --- | --- |
| 1 | a |  | 1 | 0 |
| 2 | c |  | 1 | 0 |
| 3 | c |  | 1 | 0 |
| 4 | d |  | 1 | 0 |
| 5 | b |  | 1 | 0 |
| 6 | b |  | 1 | 0 |
| 7 | a |  | 1 | 0 |
| 8 | d |  | 1 | 0 |
| 9 | a |  | 1 | 0 |
| 10 | d |  | 1 | 0 |
| 11 | c |  | 1 | 0 |
| 12 | d |  | 1 | 0 |
| 13 | c |  | 1 | 0 |
| 14 | b |  | 1 | 0 |
| 15 | a |  | 1 | 0 |
| 16 | c |  | 1 | 0 |
| 17 | d |  | 1 | 0 |
| 18 | a |  | 1 | 0 |
| 19 | b |  | 1 | 0 |
| 20 | b |  | 1 | 0 |
| 21 | a |  | 1 | 0 |
| 22 | a |  | 1 | 0 |
| 23 | b |  | 1 | 0 |
| 24 | b |  | 1 | 0 |
| 25 | c |  | 1 | 0 |
